# Supplementary material for: Combining targeted panel-based resequencing and copy-number variation analysis for the diagnosis of inherited syndromic retinopathies and associated ciliopathies
Source: PubMed Central journal article supplement (PMC5869593; doi:10.1038/s41598-018-23520-1), 2018-03-27
Supplement: 41598_2018_23520_MOESM1_ESM.pdf [file 41598_2018_23520_MOESM1_ESM.pdf]

**“Combining targeted panel-based resequencing and copy-number variation analysis for the diagnosis of inherited syndromic retinopathies and associated ciliopathies”**

Iker Sanchez-Navarro\* <sup>1, 2</sup>, Luciana Rodrigues Jacy da Silva\* <sup>1, 3</sup>, Fiona Blanco-Kelly <sup>1, 2</sup>, Olga Zurita <sup>1, 2</sup>, Noelia Sanchez-Bolivar <sup>1</sup>, Cristina Villaverde <sup>1,2</sup>, Maria Isabel Lopez-Molina <sup>4</sup>, Blanca Garcia-Sandoval <sup>4</sup>, Saoud Tahsin Swafiri <sup>1</sup>, Pablo Mínguez <sup>1</sup>, Rosa Riveiro-Alvarez <sup>1, 2</sup>, Isabel Lorda <sup>1, 2</sup>, Rocío Sanchez-Alcudia <sup>1, 2</sup>, Raquel Perez-Carro <sup>1</sup>, Diana Valverde <sup>5</sup>, Yichuan Liu <sup>6,7</sup>, Lifeng Tian <sup>6</sup>, Hakon Hakonarson <sup>6, 8, 9</sup>, Almudena Avila-Fernandez <sup>1, 2</sup>, Marta Corton\* <sup>1, 2</sup>, Carmen Ayuso\* <sup>1, 2</sup>.

<sup>1</sup> Department of Genetics, Instituto de Investigaciones Sanitarias – Fundacion Jiménez Díaz University Hospital (IIS-FJD-UAM) Madrid, Spain.

<sup>2</sup> Centre for Biomedical Network Research on Rare Diseases (CIBERER), ISCIII, Madrid, Spain.

<sup>3</sup> Universidade de Mogi das Cruzes, São Paulo, Brazil.

<sup>4</sup> Department of Ophthalmology, Fundacion Jiménez Díaz University Hospital, Madrid, Spain.

<sup>5</sup> Department of Biochemistry, Genetics and Immunology, Faculty of Biology, Universidad de Vigo, Vigo, Spain.

<sup>6</sup> Center for Applied Genomics, Abramson Pediatric Research Center, The Children's Hospital of Philadelphia, Philadelphia, PA, USA.

<sup>7</sup> Medical Scientist Training Program, Perelman School of Medicine, University of Pennsylvania, Philadelphia, PA, USA.

<sup>8</sup> Division of Human Genetics, Children's Hospital of Philadelphia, Philadelphia, PA, USA.

<sup>9</sup> The Perelman School of Medicine, University of Pennsylvania, Philadelphia, PA, USA.

\*These authors have contributed equally

**Correspondence:**

**Carmen Ayuso, MD, PhD & Marta Corton, PhD**

Department of Genetics

Fundación Jiménez Díaz University Hospital

Av. Reyes Católicos nº 2.

28040 Madrid, Spain

cayuso@fjd.es / mcorton@fjd.es

Phone ##34 609612728

## SUPPLEMENTARY FIGURE LEGENDS

**Supplementary Figure S1. Network representation of 121 disease-associated genes involved in inherited syndromic retinopathies and/or non-retinal ciliopathy.** Genes from the panel are classified in five disease classes: i) Retinal systemic ciliopathies (dark blue), ii) other ciliary genes (non-syndromic retinal dystrophies and non-retinal ciliopathy, light blue), iii) syndromic vitreoretinopathies (green), iv) peroxisomal disorders (yellow) and v) a group of genes associated with miscellaneous syndromes (red). The links between the genes represent two types of relationships, functional and phenotypic. To simplify the representation, dark connections indicate genes having both types of associations and light connections one of the two. Functional associations are taken from STRING database v10 (combined score  $\geq 400$ ). Phenotypic associations represent genes sharing a significant number of phenotypes (Human Phenotype Ontology (HPO) annotation). The significant overlap of HPO terms is calculated as follow: i) genes are annotated with their HPO terms removing very common or functional unrelated terms ("Clinical modifier" terms, except the ones under "Triggered by", "Constitutional symptom" and all under the classes "Frequency" and "Mode of inheritance" and "Mortality/Aging"), ii) calculate a score for each possible interaction (all pairs of genes in the human genome) as the percentage of overlap of annotated HPO terms taking as 100% the unique HPOs from both genes, iii) all scores are normalized to calculate a z-score for each interaction ( $z\text{-score} = (\text{score} - \text{mean}) / \text{stddev}$ ), iv) z-score values  $> 1.96$  are taken as significant.

- Retinal systemic ciliopathy
- Other Ciliary genes
- Miscellanea of syndromic retinal alteration
- Syndromic vitreoretinopathies
- Lysosomal and peroxisomal disorders

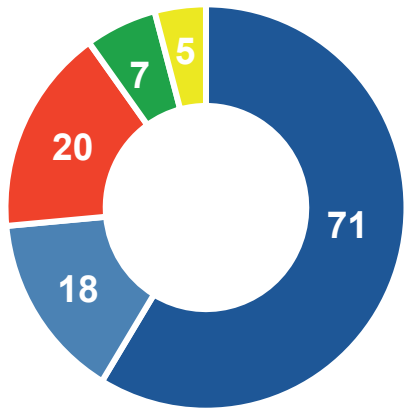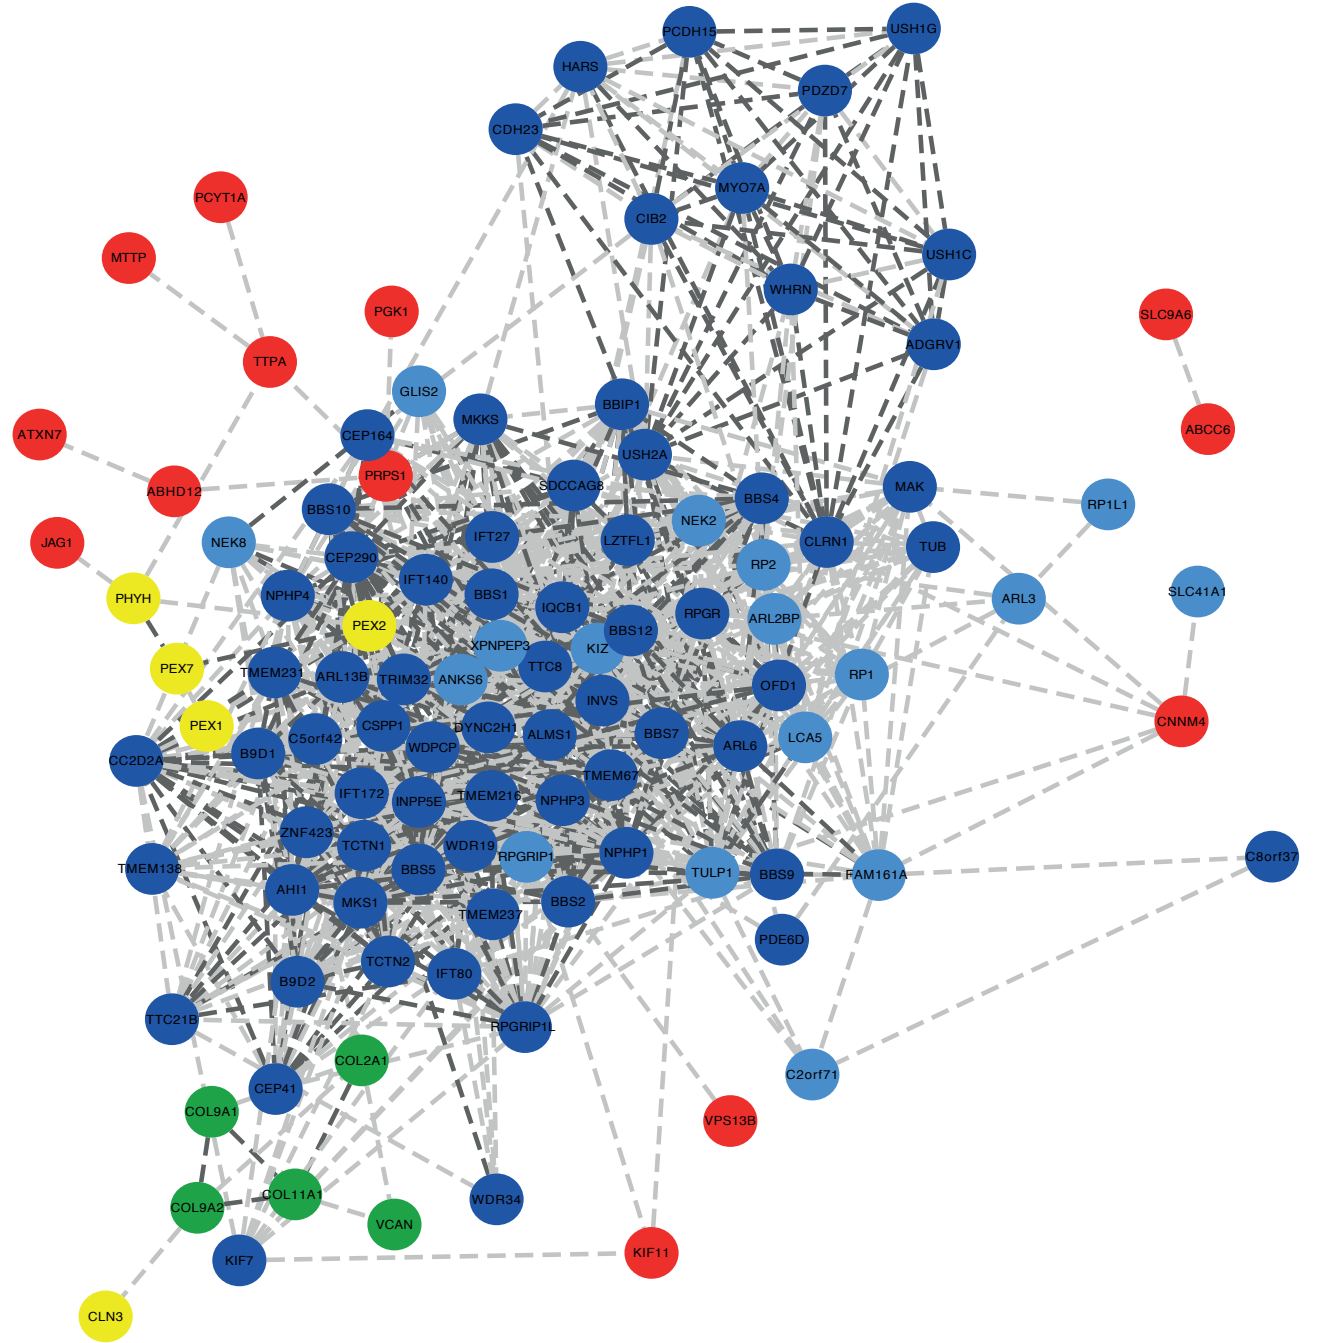

- FLVCR1
- PANK2
- TREX1
- OTX2
- GNPTG
- WFS1
- ACBD5
- ADAMTS18
- KCNJ13
- TCTN3
- TOPORS

**Supplementary Figure S2. Additional genetic analysis carried out in family V-0799.** A. MLPA analysis of *ABCC6* in the both affected siblings (II:1 and II:2) ruling out whole-gene or exon 12 deletions. The data were interpreted by taking the ratio of each probe signal between the patient and references DNA samples. A ratio of 1.0 indicates the presence of 2 alleles (normal diploid), while a ratio below 0.6 or above 1.4 suggests deletion or duplication of the target sequence, respectively. B. Haplotype analysis of the *ABCC6* locus and the neighbors genomic regions on 16p. Haplotypes were constructed using genotypes from five informative polymorphic microsatellites on 16p13.13-p12.1. Genotype for the variant (c.1483\_1485del) in *ABCC6* was also represented. Inferred genotypes for deceased mother (I:2) is represented in brackets. An identity-by-descent (IBD) region of 13 Mb was shared by both affected siblings.

**A**

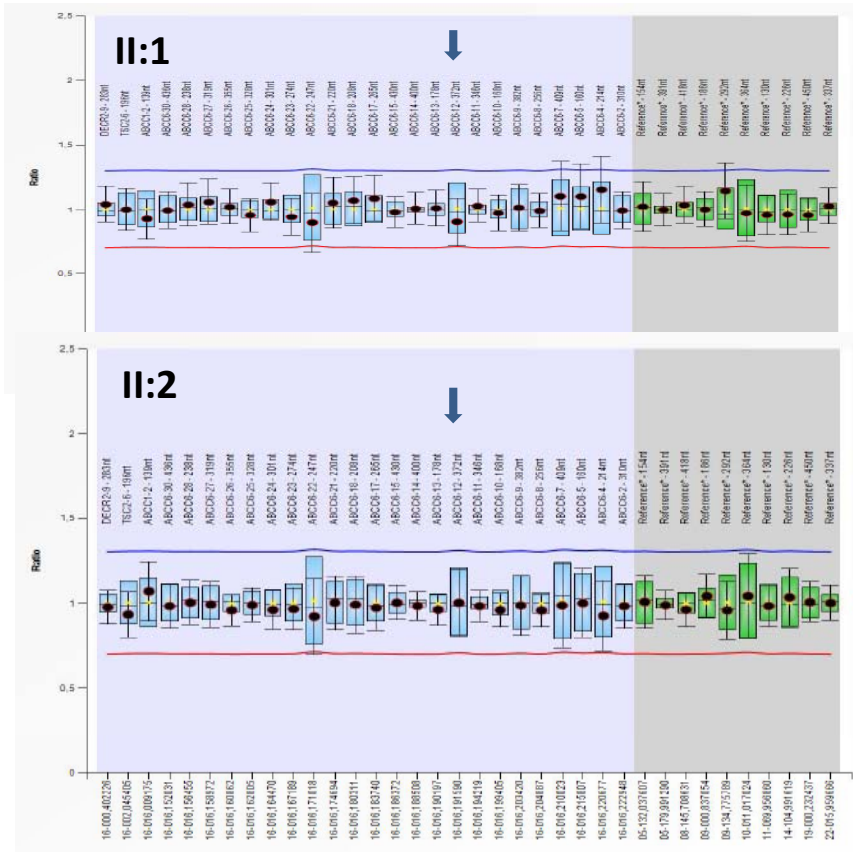

**B**

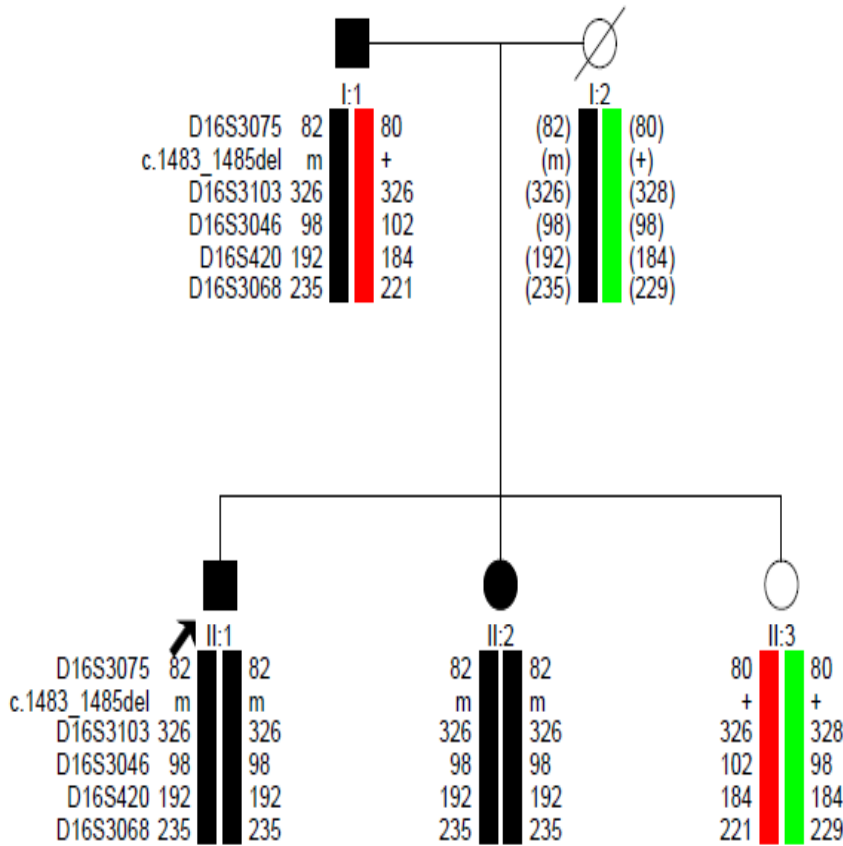

| Marker       | Chr Band | Position (Mb) |
|--------------|----------|---------------|
| D16S3075     | 16p13.13 | 12.1          |
| <b>ABCC6</b> | 16p13.11 | 16.1          |
| D16S3103     | 16p12.3  | 17.4          |
| D16S3046     | 16p12.3  | 20.9          |
| D16S420      | 16p12.1  | 24.2          |
| D16S3068     | 16p12.1  | 25.5          |

**Supplementary Figure S3. Representation of the mean coverage for the 121 target genes in all 47 samples.** For every gene, mean read number was calculated for all the samples and represented as boxplots. Except for certain highly-repetitive regions unevenly covered, most of the genes studied in the panel approach the global mean coverage of 435x. Dots represent outlier values from the distribution.

# Genes Coverage

Number of Reads (Mean of all samples)

1500  
1000  
500  
0

ABCC6  
ARHD2  
ATCBDE  
ADMTS  
ADGRI18  
ADGRV1  
AHIL  
ALMS1  
ANKS6  
ARL13B  
ARL2BP  
ARL3  
ARL6  
ATXN7  
B9D1  
B9D2  
BBIP1  
BBS10  
BBS12  
BBS32  
BBS34  
BBS35  
BBS7  
BBS9  
C2orf71  
C5orf42  
C8orf37  
CC2D2A  
CDH23  
CEP164  
CEP290  
CFE2I  
CIB2  
CLL3  
CLRM1  
GNM4  
COL11A1  
COL2A1  
COL9A1  
COL9A2  
CSPP1  
DYNC2H1  
FAM161A  
FLVCR1  
FLIS2  
GNPTG  
HMRS  
IFT140  
IFT27  
IFT80  
INPP5E  
INVS  
IQCB1  
JAG1  
KCNJ13  
KIF11  
KIF7  
LCA5  
LZTR1  
LZTR2  
MIK2  
MIK3  
MKS1  
MILP  
MYO7A  
NEK8  
NPH1  
NPH3  
NPHP4  
OFD1  
OTX2  
PANK2  
PCDH15  
PCYT1A  
PDE6D  
PDZD7  
PEX1  
PEX2  
PEX7  
PGK1  
PHYH  
PRPS1  
RPL1  
RPL11  
RPL2  
RPL22  
RPGRP1  
RPGRP1L  
SDCCAG8  
SLC4A1  
SLC9A6  
LCTN1  
LCTN2  
LCTN3  
TMEM138  
TMEM216  
TMEM231  
TMEM237  
TMEM67  
TOPORS  
TRIM32  
TLC1B  
TLC8  
TIPA  
TUB  
TULP1  
USH1C  
USH1G  
USH2A  
VCAN  
VPS13B  
WDR19  
WDR34  
WFS3  
WDRN  
XRNPEP3  
ZNF423

Genes

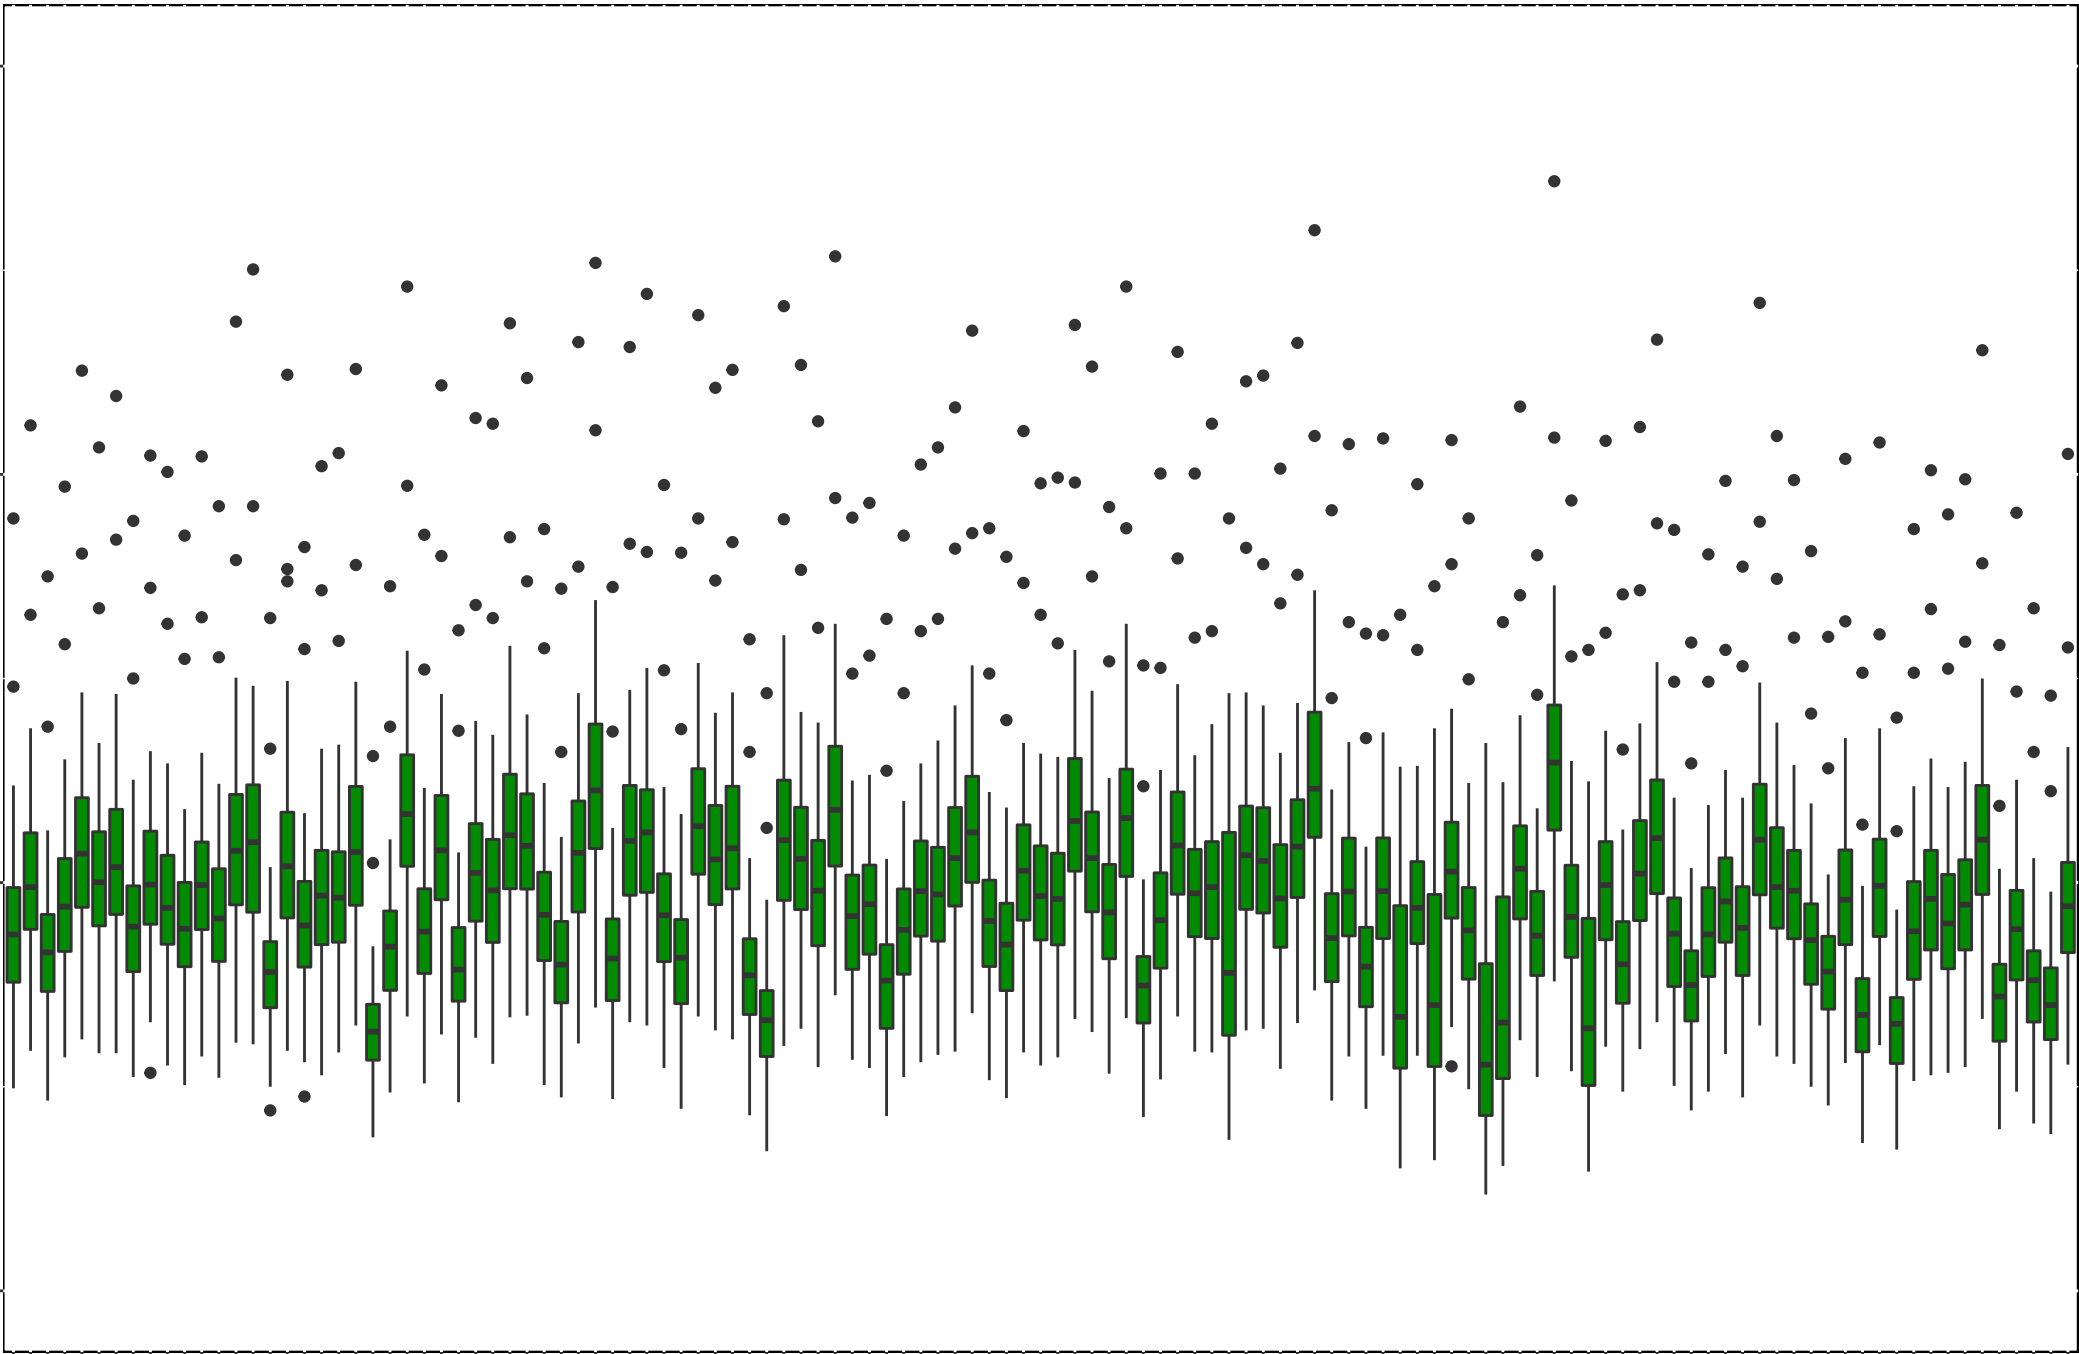

**Supplementary Table S1. Genes included in the present study.**

| Gene                               | Chromosome | Start position | End Position | No. Exons | Inheritance | Disease                                                      |
|------------------------------------|------------|----------------|--------------|-----------|-------------|--------------------------------------------------------------|
| <b>Retinal systemic ciliopathy</b> |            |                |              |           |             |                                                              |
| <i>ADGRV1</i>                      | 5          | 89854567       | 90460083     | 91        | AR          | Usher                                                        |
| <i>AHI1</i>                        | 6          | 135605060      | 135818953    | 30        | AR          | Joubert                                                      |
| <i>ALMS1</i>                       | 2          | 73612836       | 73837096     | 23        | AR          | Alstrom                                                      |
| <i>ARL13B</i>                      | 3          | 93698933       | 93774572     | 13        | AR          | Joubert                                                      |
| <i>ARL6</i>                        | 3          | 97483545       | 97517423     | 10        | AR          | BBS                                                          |
| <i>B9D1</i>                        | 17         | 19240817       | 19281545     | 11        | AR          | MKS // Joubert                                               |
| <i>B9D2</i>                        | 19         | 41860272       | 41870128     | 4         | AR          | MKS // NPHP                                                  |
| <i>BBIP1</i>                       | 10         | 112658438      | 112679174    | 6         | AR          | BBS                                                          |
| <i>BBS1</i>                        | 11         | 66278069       | 66301134     | 17        | AR          | BBS                                                          |
| <i>BBS10</i>                       | 12         | 76738216       | 76742272     | 2         | AR          | BBS                                                          |
| <i>BBS12</i>                       | 4          | 123653807      | 123666148    | 3         | AR          | BBS                                                          |
| <i>BBS2</i>                        | 16         | 56518209       | 56554058     | 17        | AR          | BBS                                                          |
| <i>BBS4</i>                        | 15         | 72978470       | 73030867     | 19        | AR          | BBS                                                          |
| <i>BBS5</i>                        | 2          | 170335956      | 170363215    | 12        | AR          | BBS                                                          |
| <i>BBS7</i>                        | 4          | 122745434      | 122791702    | 20        | AR          | BBS                                                          |
| <i>BBS9</i>                        | 7          | 33169102       | 33645730     | 23        | AR          | BBS                                                          |
| <i>C5orf42</i>                     | 5          | 37106280       | 37249580     | 52        | AR          | Joubert                                                      |
| <i>C8orf37</i>                     | 8          | 96257091       | 96281512     | 6         | AR          | BBS // non-syndromic RP                                      |
| <i>CC2D2A</i>                      | 4          | 15471439       | 15603230     | 40        | AR          | Joubert // RP with ID                                        |
| <i>CDH23</i>                       | 10         | 73156641       | 73575754     | 74        | AR          | Usher                                                        |
| <i>CEP164</i>                      | 11         | 117192444      | 117284032    | 36        | AR          | Senior-Løcken                                                |
| <i>CEP290</i>                      | 12         | 88442740       | 88536043     | 54        | AR          | BBS// Joubert // Senior- Løcken // MKKS // non-syndromic LCA |
| <i>CEP41</i>                       | 7          | 130033562      | 130081101    | 13        | AR          | Joubert                                                      |
| <i>CIB2</i>                        | 15         | 78396898       | 78423927     | 6         | AR          | Usher                                                        |
| <i>CLRN1</i>                       | 3          | 150643900      | 150690836    | 9         | AR          | Usher                                                        |
| <i>CSPP1</i>                       | 8          | 67976553       | 68108899     | 29        | AR          | Joubert // Jeune                                             |
| <i>DYNC2H1</i>                     | 11         | 102980110      | 103350641    | 90        | AR          | Jeune                                                        |
| <i>HARS</i>                        | 5          | 140053440      | 140071362    | 14        | AR          | Usher                                                        |
| <i>IFT140</i>                      | 16         | 1560378        | 1662159      | 31        | AR          | Mainzer-Saldino                                              |
| <i>IFT172</i>                      | 2          | 27667190       | 27712621     | 48        | AR          | BBS// Jeune // Mainzer-Saldino // non-syndromic RP           |
| <i>IFT27</i>                       | 22         | 37154196       | 37172227     | 9         | AR          | BBS                                                          |
| <i>IFT80</i>                       | 3          | 159974724      | 160117370    | 24        | AR          | Jeune                                                        |
| <i>INPP5E</i>                      | 9          | 139323017      | 139334306    | 10        | AR          | Joubert // MORM                                              |

Abbreviations: AD: autosomal dominant; AR: autosomal recessive; XL: X-linked; BBS : Bardet-Biedl syndrome; CRD: cone-rod dystrophy; HARP: hypoprebetalipoproteinemia, acanthocytosis, retinitis pigmentosa, pallial degeneration; LCA: Leber congenital amaurosis; MKS: Meckel syndrome; MKKS: McKusick-Kaufman syndrome; MORM: Mental retardation, truncal obesity, retinal dystrophy and micropenis; NPHP: nephronophthisis, PHARC: polyneuropathy, hypoacusia, ataxia, retinitis pigmentosa, and cataracts; ID : intellectual disability; RD: retinal dystrophy; RP: retinitis pigmentosa, S.: Syndrome, ZSSD: Zellweger syndrome spectrum disorders. Chromosome position are based on human genome build hg19.



**Supplementary Table S1. Genes included in the present study (Continued).**

| Gene                                           | Chromosome | Start position | End Position | No. Exons | Inheritance | Disease                                                                       |
|------------------------------------------------|------------|----------------|--------------|-----------|-------------|-------------------------------------------------------------------------------|
| <b>Retinal systemic ciliopathy (continued)</b> |            |                |              |           |             |                                                                               |
| <i>INVS</i>                                    | 9          | 102861452      | 103063476    | 20        | AR          | Senior-Løocken // NPHP                                                        |
| <i>IQCB1</i>                                   | 3          | 121488560      | 121553976    | 15        | AR          | Senior-Løocken                                                                |
| <i>KIF7</i>                                    | 15         | 90171151       | 90198732     | 19        | AR          | Joubert                                                                       |
| <i>LZTFL1</i>                                  | 3          | 45864760       | 45957266     | 13        | AR          | BBS                                                                           |
| <i>MAK</i>                                     | 6          | 10762906       | 10838838     | 16        | AR          | BBS // MKKS                                                                   |
| <i>MKKS</i>                                    | 20         | 10385378       | 10414937     | 7         | AR          | BBS // MKKS                                                                   |
| <i>MKS1</i>                                    | 17         | 56282747       | 56297016     | 19        | AR          | BBS // MKKS                                                                   |
| <i>MYO7A</i>                                   | 11         | 76839260       | 76926336     | 53        | AR          | Usher                                                                         |
| <i>NPHP1</i>                                   | 2          | 110880864      | 110962689    | 22        | AR          | Senior-Løocken// Joubert                                                      |
| <i>NPHP3</i>                                   | 3          | 132399403      | 132441353    | 27        | AR          | Senior-Løocken                                                                |
| <i>NPHP4</i>                                   | 1          | 5922820        | 6052583      | 30        | AR          | Jeune                                                                         |
| <i>OFD1</i>                                    | X          | 13752782       | 13787530     | 23        | XL          | Joubert // orofacioidigital S.// Simpson-Golabi-Behmel S. // non-syndromic RP |
| <i>PCDH15</i>                                  | 10         | 55562483       | 56561101     | 43        | AR          | Usher                                                                         |
| <i>PDE6D</i>                                   | 2          | 232597097      | 232646024    | 5         | AR          | Joubert                                                                       |
| <i>PDZD7</i>                                   | 10         | 102767390      | 102790964    | 18        | AR          | Usher                                                                         |
| <i>RPGR</i>                                    | X          | 38128373       | 38186838     | 20        | XL          | Non-syndromic RP and primary ciliary dyskinesia                               |
| <i>RPGRIP1L</i>                                | 16         | 53633768       | 53737821     | 27        | AR          | Joubert // MKKS                                                               |
| <i>SDCCAG8</i>                                 | 1          | 243419257      | 243663443    | 18        | AR          | Senior-Løocken // BBS // NPHP                                                 |
| <i>TCTN1</i>                                   | 12         | 111051782      | 111086985    | 20        | AR          | Joubert                                                                       |
| <i>TCTN2</i>                                   | 12         | 124155610      | 124193000    | 19        | AR          | MKKS                                                                          |
| <i>TCTN3</i>                                   | 10         | 97423103       | 97453950     | 14        | AR          | Joubert // Mohr-Majewski S.                                                   |
| <i>TMEM138</i>                                 | 11         | 61129423       | 61137025     | 7         | AR          | Joubert                                                                       |
| <i>TMEM216</i>                                 | 11         | 61159782       | 61166385     | 7         | AR          | Joubert // MKKS                                                               |
| <i>TMEM231</i>                                 | 16         | 75571965       | 75590234     | 10        | AR          | Joubert                                                                       |
| <i>TMEM237</i>                                 | 2          | 202484857      | 202508302    | 13        | AR          | Joubert                                                                       |
| <i>TMEM67</i>                                  | 8          | 94767022       | 94831510     | 34        | AR          | Joubert // MKKS// BBS // NPHP                                                 |
| <i>TRIM32</i>                                  | 9          | 119449531      | 119463629    | 3         | AR          | BBS                                                                           |
| <i>TTC21B</i>                                  | 2          | 166729822      | 166810398    | 29        | AR          | Jeune                                                                         |
| <i>TTC8</i>                                    | 14         | 89290928       | 89344385     | 15        | AR          | BBS // non-syndromic RP                                                       |
| <i>TUB</i>                                     | 11         | 8060130        | 8127704      | 14        | AR          | RD with Obesity                                                               |
| <i>USH1C</i>                                   | 11         | 17515392       | 17566013     | 28        | AR          | Usher                                                                         |
| <i>USH1G</i>                                   | 17         | 72912126       | 72919401     | 3         | AR          | Usher                                                                         |
| <i>USH2A</i>                                   | 1          | 215796186      | 216596788    | 73        | AR          | Usher                                                                         |
| <i>WDPCP</i>                                   | 2          | 63348485       | 63815917     | 18        | AR          | BBS // MKKS                                                                   |
| <i>WDR19</i>                                   | 4          | 39183974       | 39287480     | 37        | AR          | Senior-Løocken // Jeune                                                       |
| <i>WDR34</i>                                   | 9          | 131395890      | 131419179    | 9         | AR          | Jeune                                                                         |
| <i>WHRN</i>                                    | 9          | 117164310      | 117267786    | 14        | AR          | Usher                                                                         |
| <i>ZNF423</i>                                  | 16         | 49524465       | 49891880     | 9         | AR          | Joubert                                                                       |

Abbreviations: AD: autosomal dominant; AR: autosomal recessive; XL: X-linked; BBS : Bardet-Biedl syndrome; CRD: cone-rod dystrophy; HARP: hypoprebetalipoproteinemia, acanthocytosis, retinitis pigmentosa, pallial degeneration; LCA: Leber congenital amaurosis; MKS: Meckel syndrome; MKKS: McKusick-Kaufman syndrome; MORM: Mental retardation, truncal obesity, retinal dystrophy and micropenis; NPHP: nephronophthisis, PHARC: polyneuropathy, hypoacusia, ataxia, retinitis pigmentosa, and cataracts; ID : intellectual disability; RD: retinal dystrophy; RP: retinitis pigmentosa, S.: Syndrome, ZSSD: Zellweger syndrome spectrum disorders. Chromosome position are based on human genome build hg19.

**Supplementary Table S1. Genes included in the present study (Continued).**

| Gene                                                                             | Chromosome | Start position | End Position | No. Exons | Inheritance | Disease                                    |
|----------------------------------------------------------------------------------|------------|----------------|--------------|-----------|-------------|--------------------------------------------|
| <b>Ciliary genes associated with non-syndromic RD and non-retinal ciliopathy</b> |            |                |              |           |             |                                            |
| ANKS6                                                                            | 9          | 101494241      | 101558844    | 15        | AR          | NPHP                                       |
| ARL2BP                                                                           | 16         | 57278988       | 57287595     | 6         | AR          | Non-syndromic RP                           |
| ARL3                                                                             | 10         | 104433434      | 104474240    | 6         | AR          | Non-syndromic RP                           |
| C2orf71                                                                          | 2          | 29284506       | 29297177     | 2         | AR          | Non-syndromic RP                           |
| FAM161A                                                                          | 2          | 62051933       | 62081328     | 8         | AR          | Non-syndromic RP                           |
| GLIS2                                                                            | 16         | 4382175        | 4389648      | 6         | AR          | NPHP                                       |
| KIZ                                                                              | 20         | 21106574       | 21227308     | 13        | AR          | Non-syndromic RCD                          |
| LCA5                                                                             | 6          | 80194658       | 80247197     | 10        | AR          | Non-syndromic LCA                          |
| NEK2                                                                             | 1          | 211831549      | 211849022    | 10        | AR          | Non-syndromic RP                           |
| NEK8                                                                             | 17         | 27055782       | 27069834     | 15        | AR          | Renal-hepatic-pancreatic dysplasia // NPHP |
| RP1                                                                              | 8          | 55528577       | 55543444     | 4         | AD, AR      | Non-syndromic RP                           |
| RP1L1                                                                            | 8          | 10463810       | 10512667     | 4         | AD, AR      | Non-syndromic MD // RP                     |
| RP2                                                                              | X          | 46696297       | 46741841     | 5         | XL          | Non-syndromic RP                           |
| RPGRIP1                                                                          | 14         | 21756086       | 21819510     | 24        | AR          | Non-syndromic LCA                          |
| SLC41A1                                                                          | 1          | 205758171      | 205782211    | 11        | AR          | NPHP-like                                  |
| TOPORS                                                                           | 9          | 32540492       | 32552676     | 3         | AD          | Non-syndromic RP                           |
| TULP1                                                                            | 6          | 35465601       | 35480697     | 15        | AR          | Non-syndromic RP // LCA                    |
| XPNPEP3                                                                          | 22         | 41253035       | 41328873     | 12        | AR          | NPHP-like                                  |

| Gene                                 | Chromosome | Start position | End Position | No. Exons | Inheritance | Disease                                                           |
|--------------------------------------|------------|----------------|--------------|-----------|-------------|-------------------------------------------------------------------|
| <b>Syndromic vitreoretinopathies</b> |            |                |              |           |             |                                                                   |
| ADAMTS18                             | 16         | 77315975       | 77469061     | 23        | AR          | Knobloch S., RD and autism                                        |
| COL11A1                              | 1          | 103341973      | 103574102    | 68        | AD          | Stickler                                                          |
| COL2A1                               | 12         | 48366698       | 48398335     | 54        | AD          | Stickler                                                          |
| COL9A1                               | 6          | 70925693       | 71012836     | 39        | AR          | Stickler                                                          |
| COL9A2                               | 1          | 40766113       | 40782989     | 32        | AR          | Stickler                                                          |
| KCNJ13                               | 2          | 233630462      | 233641325    | 5         | AD, AR      | Dominant vitreoretinal degeneration with systemic diseases // LCA |
| VCAN                                 | 5          | 82767443       | 82878172     | 15        | AD          | Wagner                                                            |

| Gene                                       | Chromosome | Start position | End Position | No. Exons | Inheritance | Disease        |
|--------------------------------------------|------------|----------------|--------------|-----------|-------------|----------------|
| <b>Lysosomal and peroxisomal disorders</b> |            |                |              |           |             |                |
| CLN3                                       | 16         | 28488550       | 28503673     | 17        | AR          | Batten disease |
| PEX1                                       | 7          | 92116287       | 92157895     | 24        | AR          | ZSSD           |
| PEX2                                       | 8          | 77892444       | 77913330     | 6         | AR          | ZSSD           |
| PEX7                                       | 6          | 137143652      | 137235122    | 10        | AR          | ZSSD           |
| PHYH                                       | 10         | 13319746       | 13342180     | 10        | AR          | Refsum disease |

Abbreviations: AD: autosomal dominant; AR: autosomal recessive; XL: X-linked; BBS : Bardet-Biedl syndrome; CRD: cone-rod dystrophy; HARP: hypoprebetalipoproteinemia, acanthocytosis, retinitis pigmentosa, pallial degeneration; LCA: Leber congenital amaurosis; MKS: Meckel syndrome; MKKS: McKusick-Kaufman syndrome; MORM: Mental retardation, truncal obesity, retinal dystrophy and micropenis; NPHP: nephronophthisis, PHARC: polyneuropathy, hypoacusia, ataxia, retinitis pigmentosa, and cataracts; ID : intellectual disability; RD: retinal dystrophy; RP: retinitis pigmentosa, S.: Syndrome, ZSSD: Zellweger syndrome spectrum disorders. Chromosome position are based human genome build hg19.

**Supplementary Table S1. Genes included in the present study (Continued).**

| Gene                                               | Chromosome | Start position | End Position | No. Exons | Inheritance | Disease                                            |
|----------------------------------------------------|------------|----------------|--------------|-----------|-------------|----------------------------------------------------|
| <b>Miscellanea of syndromic retinal alteration</b> |            |                |              |           |             |                                                    |
| <i>ABCC6</i>                                       | 16         | 16243372       | 16317378     | 32        | AD, AR      | Pseudoxanthoma elasticum                           |
| <i>ABHD12</i>                                      | 20         | 25275329       | 25371668     | 14        | AR          | PHARC S.                                           |
| <i>ACBD5</i>                                       | 10         | 27484093       | 27531118     | 16        | AR          | Syndromic CRD                                      |
| <i>ATXN7</i>                                       | 3          | 63850183       | 63989186     | 15        | AD          | Spinocerebellar ataxia with RD                     |
| <i>CNNM4</i>                                       | 2          | 97426589       | 97477678     | 7         | AR          | Jalili S.                                          |
| <i>FLVCR1</i>                                      | 1          | 213031547      | 213072755    | 10        | AR          | RP with posterior column ataxia                    |
| <i>GNPTG</i>                                       | 16         | 1401850        | 1413402      | 11        | AR          | RP with spondyloepiphyseal dysplasia               |
| <i>JAG1</i>                                        | 20         | 10618282       | 10654744     | 26        | AD          | Alagille S.                                        |
| <i>KIF11</i>                                       | 10         | 94352775       | 94415202     | 22        | AD          | Chorioretinopathy with microcephaly and lymphedema |
| <i>MTTP</i>                                        | 4          | 100485190      | 100545204    | 19        | AR          | Abetalipoproteinemia and pigmentary RD             |
| <i>OTX2</i>                                        | 14         | 57267375       | 57277244     | 8         | AD          | LCA with pituitary dysfunction                     |
| <i>PANK2</i>                                       | 20         | 3869436        | 3904552      | 9         | AR          | HARP S. // Hallervorden-Spatz                      |
| <i>PCYT1A</i>                                      | 3          | 195965203      | 196014634    | 10        | AR          | CRD with skeletal disease                          |
| <i>PGK1</i>                                        | X          | 77359616       | 77382374     | 11        | XL          | RP with myopathy                                   |
| <i>PRPS1</i>                                       | X          | 106871604      | 106894306    | 7         | XL          | Neuropathy, optic atrophy, deafness, and RP        |
| <i>SLC9A6</i>                                      | X          | 135067533      | 135129478    | 19        | XL          | Christianson S. with RP                            |
| <i>TREX1</i>                                       | 3          | 48506869       | 48509094     | 5         | AD          | Retinal vasculopathy with cerebral leukodystrophy  |
| <i>TTPA</i>                                        | 8          | 63971998       | 63998662     | 5         | AD, AR      | Spinocerebellar ataxia with RP                     |
| <i>VPS13B</i>                                      | 8          | 100025444      | 100889864    | 66        | AR          | Cohen S.                                           |
| <i>WFS1</i>                                        | 4          | 6271527        | 6305042      | 9         | AR          | Wolfram S.                                         |

Abbreviations: AD: autosomal dominant; AR: autosomal recessive; XL: X-linked; BBS : Bardet-Biedl syndrome; CRD: cone-rod dystrophy; HARP: hypoprebetalipoproteinemia, acanthocytosis, retinitis pigmentosa, pallial degeneration; LCA: Leber congenital amaurosis; MKS: Meckel syndrome; MKKS: McKusick-Kaufman syndrome; MORM: Mental retardation, truncal obesity, retinal dystrophy and micropenis; NPHP: nephronophthisis, PHARC: polyneuropathy, hypoacusia, ataxia, retinitis pigmentosa, and cataracts; ID : intellectual disability; RD: retinal dystrophy; RP: retinitis pigmentosa, S.: Syndrome, ZSSD: Zellweger syndrome spectrum disorders. Chromosome position are based on human genome build hg19.

**Supplementary Table S2. Overview of likely pathogenic variants in autosomal recessive genes without a second likely pathogenic allele.**

| <i>Gene</i>    | <i>cDNA</i>         | <i>Protein</i> | <i>Type</i> | <i>Zygoty</i> | <i>HGMD</i> | <i>Classification</i>    | <i>dbSNP</i> | <i>gnomAD</i> | <i>Phenotype of carrier individual</i> | <i>Observation</i>                                                                                    |
|----------------|---------------------|----------------|-------------|---------------|-------------|--------------------------|--------------|---------------|----------------------------------------|-------------------------------------------------------------------------------------------------------|
| <i>ALMS1</i>   | c.2666C>G           | p.(Ser889*)    | Nonsense    | HET           | N           | Pathogenic               | NA           | NA            | Atypical Alström                       |                                                                                                       |
| <i>BBS12</i>   | c.1316_1318del      | p.(Ser440del)  | Inframe     | HET           | N           | Likely pathogenic        | NA           | NA            | RP + ID                                |                                                                                                       |
| <i>IFT172</i>  | c.4311+1G>T         |                | Splicing    | HET           | N           | Likely pathogenic        | NA           | NA            | RP + ataxia                            |                                                                                                       |
| <i>MYO7A</i>   | c.1403A>G           | p.(His468Arg)  | Missense    | HET           | Y           | Likely pathogenic vs VUS | rs200304238  | 0.00015       | RP + ID + deafness                     |                                                                                                       |
| <i>RPGRIP1</i> | exon 17-19 deletion |                | CNV         | HET           | N           | Pathogenic               | NA           | 2 individuals | RP + ID + various disorders            | No causal. Homozygous LOF pathogenic variant found in a novel disease gene <i>SCAPER</i> <sup>1</sup> |
| <i>PDZD7</i>   | c.642C>A            | p.(Tyr214*)    | Nonsense    | HET           | N           | Pathogenic               | NA           | NA            | RP + ID                                | Likely no causal variant. No phenotypic concordance with Usher syndrome                               |
| <i>USH2A</i>   | c.5666A>G           | p.(Asp1889Gly) | Missense    | HET           | Y           | Likely pathogenic vs VUS | rs775803174  | NA            | Atypical Usher                         |                                                                                                       |
| <i>USH2A</i>   | c.2276G>T           | p.(Cys759Phe)  | Missense    | HET           | Y           | Pathogenic               | rs80338902   | 0.00094       | Stickler (AD)                          | Likely no causal. No phenotypic nor inheritance concordance with Usher syndrome                       |
| <i>WDPCP</i>   | c.208+1G>A          |                | Splicing    | HET           | N           | Likely pathogenic        | rs187135801  | 0.00023       | Atypical Alström                       |                                                                                                       |

AD: autosomal dominant inheritance; HET: heterozygous; ID: intellectual disability; LOF: loss-of- function; NA: non reported; RP: retinitis pigmentosa; VUS: variant of unknown significance.

**Supplementary Table S3. Novel likely pathogenic variants found in this study.**

| Gene   | cDNA                       | Protein             | Type              | Zygotity | Align<br>GVGD | SIFT | MutTaster | Polyphen             | CADD  | Segregation    | Freq.<br>ExAC | Other predictors                    | Pathogenic |
|--------|----------------------------|---------------------|-------------------|----------|---------------|------|-----------|----------------------|-------|----------------|---------------|-------------------------------------|------------|
| ABCC6  | NM_001171.5:c.1483_1485del | p.(Leu495del)       | In-frame deletion | HOM      | ----          | ---- | ----      | ----                 | 37    | NA             | NA            | D (PROVEAN)                         | Likely     |
| ALMS1  | NM_015120.4:c.4252del      | p.(Arg1418Glyfs*55) | Frameshift        | HOM      | ----          | ---- | ----      | ----                 | 38    | Y              | NA            |                                     | Y          |
| ALMS1  | NM_015120.4:c.2666C>G      | p.(Ser889*)         | Nonsense          | HET      | ----          |      |           | ----                 | 38    | Y              | NA            |                                     | Y          |
| BBS12  | c.1316_1318del             | p.(Ser440del)       | In-frame deletion | HET      | ----          |      |           | ----                 | 12.75 | NA             | NA            | D (PROVEAN)                         | Likely     |
| CEP41  | NM_018718.2:c.5C>T         | p.(Ser2Phe)         | Missense          | HOM      | C25           | D    | D         | Probably<br>damaging | 26.3  | NA             | 0.028%        |                                     | Likely     |
| IFT172 | c.4311+1G>T                | Splicing defect     | Splice donor      | HET      | ----          | ---- | ----      | ----                 | 25.2  | NA             | NA            | 100% variation for<br>donor site    | Likely     |
| IFT27  | NM_006860.4:c.104A>G       | p.(Tyr35Cys)        | Missense          | HET *    | C65           | D    | D         | Probably<br>damaging | 29.2  | NA             | NA            |                                     | Likely     |
| IFT27  | NM_006860.4:c.350-2A>G     | Splicing defect     | Splice acceptor   | HET *    | ----          |      | ----      | ----                 | 23.3  | NA             | NA            | 100% variation for<br>acceptor site | Y          |
| OTX2   | c.559C>T                   | p.(Gln187*)         | Nonsense          | HET      | ----          | ---- | ----      | ----                 | 23.2  | <i>de novo</i> | Y             |                                     | Y          |
| OTX2   | c.255G>A                   | p.(Trp85*)          | Nonsense          | HET      | ----          | ---- | ----      | ----                 | 24.4  | <i>de novo</i> | NA            |                                     | Y          |
| PDZD7  | c.642C>A                   | p.(Tyr214*)         | Nonsense          | HET      | ----          | ---- | ----      | ----                 | 5385  | NA             | NA            |                                     | Y          |
| VPS13B | c.1512del                  | p.(Glu505Lysfs*23)  | Frameshift        | HOM      | ----          | ---- | ----      | ----                 | 29.8  | Y              | NA            |                                     | Y          |
| WDPCP  | c.208+1G>A                 | Splicing defect     | Splice donor      | HET      | ----          | ---- | ----      | ----                 | 33    | NA             | 0.00023       | 100% variation for<br>donor site    | Likely     |

The novel variants were not found in several databases, including HGMD, ExAC and the Spanish Variant Server. Aminoacid substitution in missense variant is predicted damaging by SIFT if the score is  $\leq 0.05$  and PROVEAN score is  $< -2.5$ ; Polyphen predicts a non-synonymous variant as benign, possibly damaging, or probably damaging, if score is  $< 0.2$ , between  $0.2$  and  $0.85$  or  $> 0.85$ ; GV: Grantham Variation; GD: Grantham distribution. Class C65: most likely pathogenic, Class C0: less likely pathogenic; Mutation Taster: deleterious  $> 0.65$ ; CADD: deleterious  $> 15$ . \*: Variant found in *trans* with a second pathogenic allele. Abbreviations: HOM: homozygous; HET: heterozygous; NA: not available; Y: considered as pathogenic.

**Supplementary Table S4. Deep intronic variants included in the gene panel.**

| Gene          | Genomic coordinates (hg19) | cDNA                                   | Reference |
|---------------|----------------------------|----------------------------------------|-----------|
| <i>CEP290</i> | chr12:88494960             | NM_025114: c.2991_1655A>G; p.(Cys998*) | 2         |
| <i>USH2A</i>  | chr1:216064540             | NM_206933.2: c.7595-2144A>G            | 3         |
| <i>OFD1</i>   | chrX:13768358              | NM_003611.2: c.935+706A>G              | 4         |
| <i>BBS1</i>   | chr11:66291105             | NM_024649.4: c.951+58C>T               | 5         |

## REFERENCES

- 1 Tatour, Y. et al., Mutations in SCAPER cause autosomal recessive retinitis pigmentosa with intellectual disability. *J Med Genet* (2017).
- 2 den Hollander, A. I. et al., Mutations in the CEP290 (NPHP6) gene are a frequent cause of Leber congenital amaurosis. *Am J Hum Genet* **79** (3), 556 (2006).
- 3 Vache, C. et al., Usher syndrome type 2 caused by activation of an USH2A pseudoexon: implications for diagnosis and therapy. *Hum Mutat* **33** (1), 104 (2012).
- 4 Webb, T. R. et al., Deep intronic mutation in OFD1, identified by targeted genomic next-generation sequencing, causes a severe form of X-linked retinitis pigmentosa (RP23). *Hum Mol Genet* **21** (16), 3647 (2012).
- 5 Abu Safieh, L. et al., Clinical and molecular characterisation of Bardet-Biedl syndrome in consanguineous populations: the power of homozygosity mapping. *J Med Genet* **47** (4), 236 (2009).

**Supplementary Table S5. Previously known variants used as controls.**

| <b>Gene</b>   | <b>RefSeq</b>  | <b>cDNA</b> | <b>Protein</b>     | <b>Method</b>      | <b>refSNP</b> | <b>Effect</b>     |
|---------------|----------------|-------------|--------------------|--------------------|---------------|-------------------|
| <i>BBS2</i>   | NM_031885.3    | c.209A>G    | p.(Asn70Ser)       | BBS Chip, Sanger   | rs4784677     | Likely pathogenic |
| <i>ALMS1</i>  | NM_015120.4    | c.5465C>T   | p.(Pro1822Leu)     | BBS Chip, Sanger   | rs238997      | VUS               |
| <i>CEP290</i> | NM_025114.3    | c.4028delA  | p.(Lys1343Argfs*2) | LCA Chip, Sanger   | rs1057519245  | Likely pathogenic |
| <i>BBS1</i>   | NM_024649.4    | c.1645G>T   | p.(Glu549*)        | BBS Chip, Sanger   | rs121917777   | Pathogenic        |
| <i>MKKS</i>   | NM_170784.2    | c.724G>T    | p.(Ala242Ser)      | BBS Chip, Sanger   | rs74315394    | Likely benign     |
| <i>CDH23</i>  | NM_001171930.1 | c.1096G>A   | p.(Ala366Thr)      | Usher Chip, Sanger | rs143282422   | Likely benign     |

Abbreviations: BBS: Bardet-Biedl syndrome; LCA: Leber congenital amaurosis; VUS: variant of unknown significance.
